# Supplementary material
Source: Springer Nature journal article supplement (https://www.springermedizin.de/resource/supplementary/12943_2013_1170_MOESM4_ESM.pdf/9552640)
Supplement: MOESM4 [file 9552640]

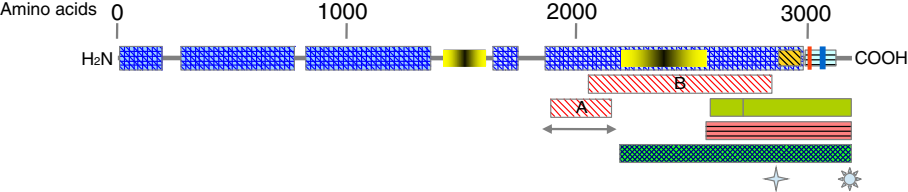

| Motif                                                                              | Amino acid region                             |                                                      |
|------------------------------------------------------------------------------------|-----------------------------------------------|------------------------------------------------------|
|    | Regions with coiled-coil                      | 14-197, 273-769, 823-1328, 1642-1746, 1862-2987 [17] |
|    | Regions with tandem repeats                   | 1435-1626, 2207-2568 [18]                            |
|    | Core region containing two leucine zippers    | 2889-2984 [19]                                       |
|    | Putative chromatin binding region             | 2999-3134 [19]                                       |
|    | Bipartite nuclear localization signal         | 3015-3032 [13]                                       |
|    | Retinoblastoma protein binding site           | 3056-3088 [13]                                       |
|    | Two ATF4 binding sites within the two regions | 2581-2742, 2742-3210 [21]                            |
|    | Centromere/kinetochore targeting domain       | 2585-3210 [20]                                       |
|    | Region conferring spindle pole localization   | 2191-3210 [16]                                       |
|    | SMC domains                                   | Prok A: 1882-2153, Prok B: 2048-2854 [17]            |
|    | Acetylation site                              | 2875 [22]                                            |
|    | Farnesylation site                            | 3207 [23]                                            |
|  | Sequence covered by CENP-F peptides A1-A33    | 1855-2189                                            |
